# Supplementary material for: Structural basis of epilepsy-related ligand–receptor complex LGI1–ADAM22
Source: PubMed Central journal article supplement (PMC5906670; doi:10.1038/s41467-018-03947-w), 2018-04-18
Supplement: 41467_2018_3947_MOESM3_ESM.pdf [file 41467_2018_3947_MOESM3_ESM.pdf]

## **Description of Additional Supplementary Files**

File Name: Supplementary Data 1

Description: Primer sequences used in this study
